# Supplementary material for: Identification of Redox-Sensitive Transcription Factors as Markers of Malignant Pleural Mesothelioma
Source: MDPI journal article supplement (doi:10.3390/cancers13051138), 2021-03-07
Supplement: s1 [file s1]

# Identification of Redox-Sensitive Transcription Factors as Markers of Malignant Pleural Mesothelioma

Martina Schiavello, Elena Gazzano, Loredana Bergandi, Francesca Silvagno, Roberta Libener, Chiara Riganti and Elisabetta Aldieri

**Figure S1:** we performed experiments to evaluate p53 and PTEN at nuclear level. Results shown in the figure demonstrated a partially not so significative downregulation of PTEN and p53 in MPM cells towards HMC.

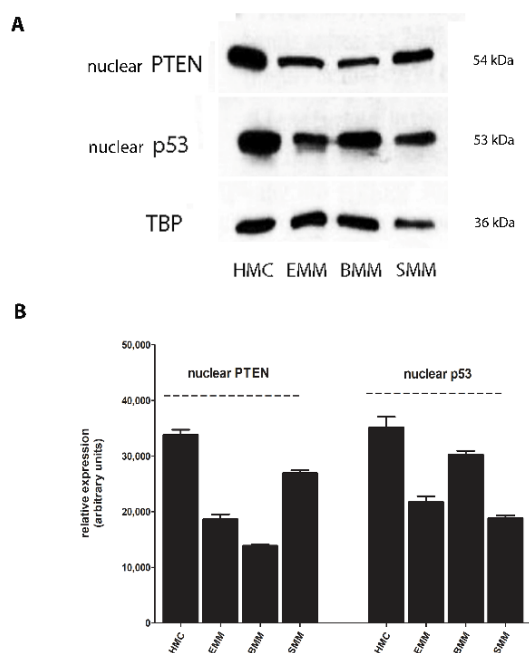

**Figure S1.** Nuclear expression of PTEN and p53 proteins induced by Ref-1 in MPM cells. **(A)** Western Blot of nuclear PTEN, p53 and TBP proteins in HMC, EMM, SMM and BMM cells. **(B)** Densitometric analysis ( $n = 3$ ).

**Figure S2:** we performed some experiments by incubating HMC with monodispersed synthetic amorphous silica, made up of spheres (MSS), already used by our research group in the past and associated to a no toxic effect [Ghiazza M. et al. Does vitreous silica contradict the toxicity of the crystalline silica paradigm? *Chem Res Toxicol* **2010**, 23, 620-629].

The figure shows results after 24h incubation of HMC with 80  $\mu\text{g}/\text{cm}^2$  MSS and 25  $\mu\text{g}/\text{cm}^2$  crocidolite (Croc, the higher dose used in experiments in the paper as Croc4). Nrf2, Ref-1 and FOXM1 are overexpressed only when incubated with crocidolite asbestos and not after MSS exposure:

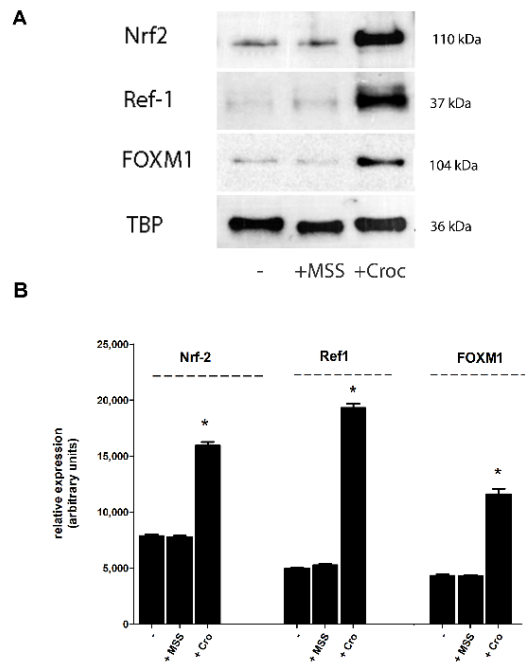

**Figure S2:** Increased expression of Nrf2, Ref-1 and FOXM1 after exposure. (A) Western Blot of nuclear extracts of Nrf2, Ref-1 and FOXM1 from HMC untreated (-) or treated (+) for 24 h with 80  $\mu\text{g}/\text{cm}^2$  monodispersed synthetic amorphous silica (MSS) and 25  $\mu\text{g}/\text{cm}^2$  crocidolite asbestos (Croc) asbestos. (B) Densitometric analysis of the relative expression of Nrf2 ( $n=3$ , \*  $p < 0.001$ ), Ref-1 ( $n = 3$ , \*  $p < 0.001$ ) and FOXM1 ( $n = 3$ , \*  $p < 0.001$ ) respectively.

**Figure S3:** we measured the basal ROS level in HMC and MPM cells (the method is described below). The results in the figure demonstrated a significantly lower level of ROS in MPM cells than in HMC, thus confirming that the overexpression of redox-sensitive transcription factors studied presumably are crucial in counteracting basal oxidative stress at the cellular level.

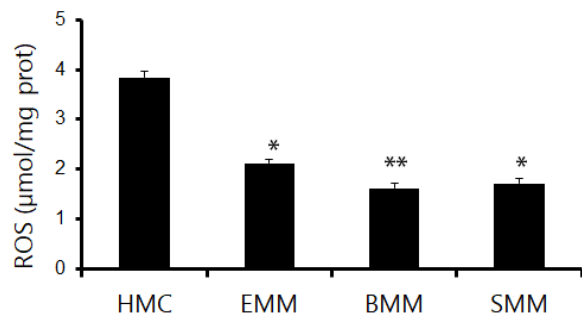

**Figure S3.** Intracellular ROS levels in all three histological types of MPM, epithelioid (EMM), sarcomatoid (SMM) and biphasic (BMM) forms, towards HMC. Data are presented as the means  $\pm$  SD ( $n = 3$ ). The results were analyzed as described in Materials and Methods: vs HMC, \*  $p < 0.05$ ; \*\*  $p < 0.005$ .

**Measurement of Reactive Oxygen Species (ROS).** Cells were incubated for 15 min with 10  $\mu$ M 2',7'-dichlorodihydrofluorescein diacetate (DCFH-DA). DCFH-DA is a cell-permeable probe that is cleaved intracellularly by non-specific esterases to form DCFH, which is further oxidized by ROS to form the fluorescent compound dichlorofluorescein (DCF). After incubation with DCFH-DA the cells were washed twice with PBS to remove excess probe and DCF fluorescence was determined at excitation wavelength of 504 nm and emission wavelength of 529 nm, using a Perkin-Elmer LS-5 fluorimeter (Perkin Elmer, Shelton, CT). The fluorescence value was normalized for the protein concentration and expressed as  $\mu$ mol/mg cellular proteins.

**Table S1:** analysis data on MPM cells obtained from total 9 MPM patients, 3 for each histotype (epithelioid, biphasic, sarcomatous), of the Biological Bank of Mesothelioma (AO Nazionale di Alessandria, Italy)

| MPM                    | MORPHOLOGY | CALRET  | PANCK | D2-40 | EMA      | CEA      | WT1 | CK5 | BAP1    | NF2     |
|------------------------|------------|---------|-------|-------|----------|----------|-----|-----|---------|---------|
| <b>MPM EPITELIOID</b>  |            |         |       |       |          |          |     |     |         |         |
| COD 317                | EPI        | POS     | POS   | NEG   | NEG      | NEG      | POS | NEG | POS N   | POS N   |
| COD 404                | EPI        | POS 50% | NEG   | NEG   | NEG      | NEG      | POS | NEG | POS N   | POS N/C |
| COD 722                | EPI        | POS     | POS   | NEG   | spor POS | spor POS | POS | NEG | NEG     | POS N   |
| <b>MPM BIPHASIC</b>    |            |         |       |       |          |          |     |     |         |         |
| COD 359                | EPI        | POS     | POS   | NEG   | NEG      | NEG      | POS | NEG | POS N   | POS N   |
| COD 421                | BIPH       | POS     | POS   | NEG   | NEG      | NEG      | NEG | NEG | NEG 95% | POS N/C |
| COD 672                | EPI        | POS     | POS   | NEG   | NEG      | NEG      | POS | NEG | POS N   | POS N/C |
| <b>MPM SARCOMATOID</b> |            |         |       |       |          |          |     |     |         |         |
| COD 353                | SARC       | NEG     | POS   | NEG   | NEG      | NEG      | NEG | NEG | NEG 95% | POS C   |
| COD 432                | EPI        | NEG     | NEG   | NEG   | NEG      | NEG      | POS | NEG | POS N   | POS N/C |
| COD 720                | EPI        | NEG     | POS   | NEG   | NEG      | NEG      | NEG | NEG | POS N   | POS N/C |
