# Supplementary figures and images for: Identification of Redox-Sensitive Transcription Factors as Markers of Malignant Pleural Mesothelioma
Source: MDPI journal article supplement (doi:10.3390/cancers13051138), 2021-03-07

# Figure 1

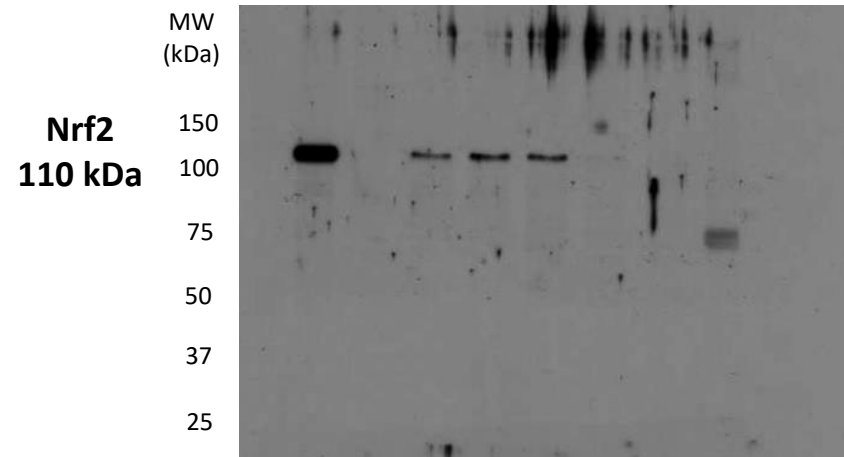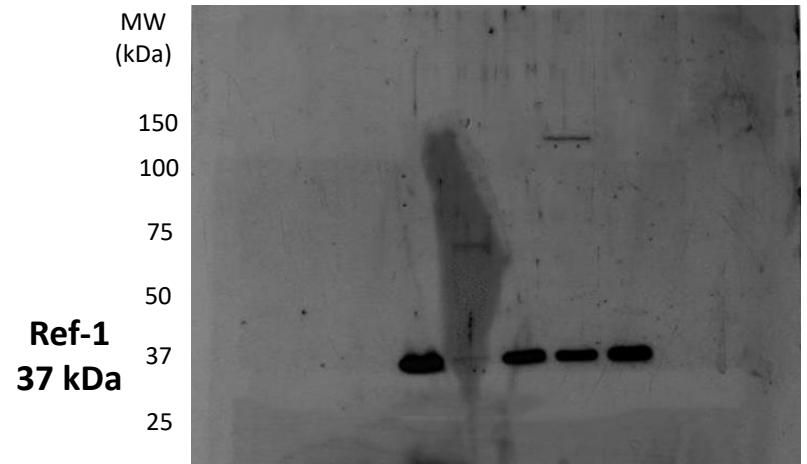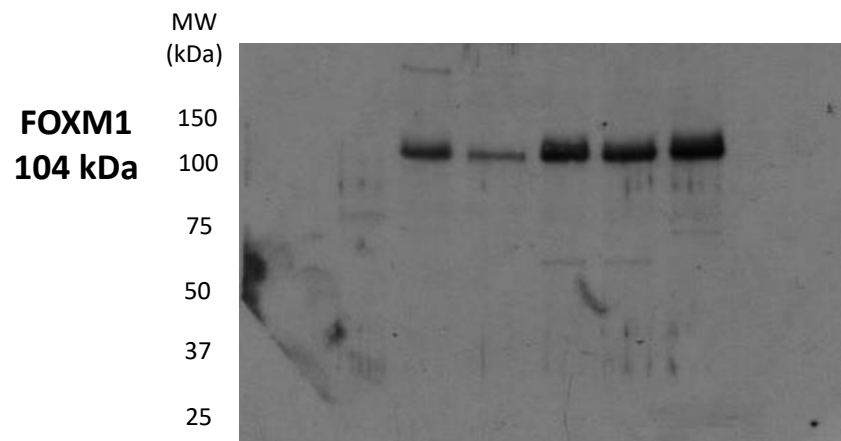

**Figure 2**

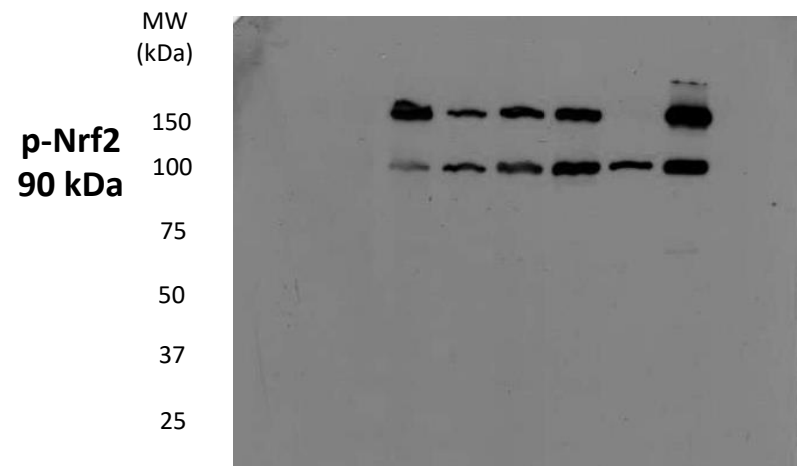

**Figure 3**

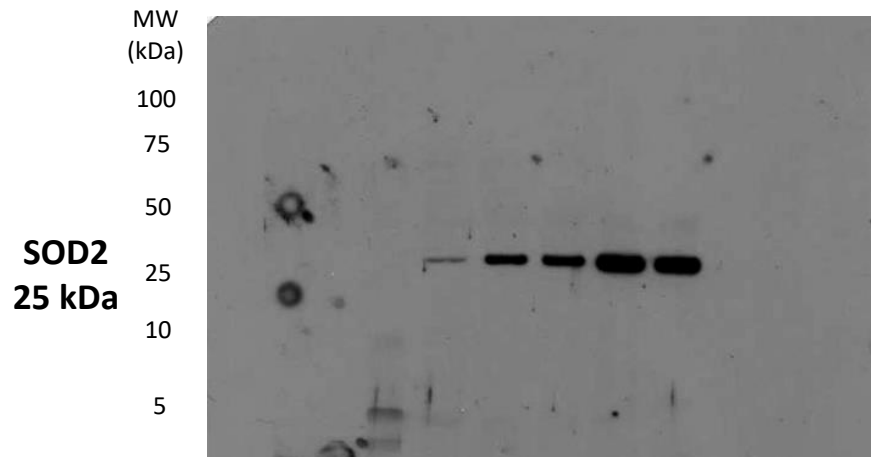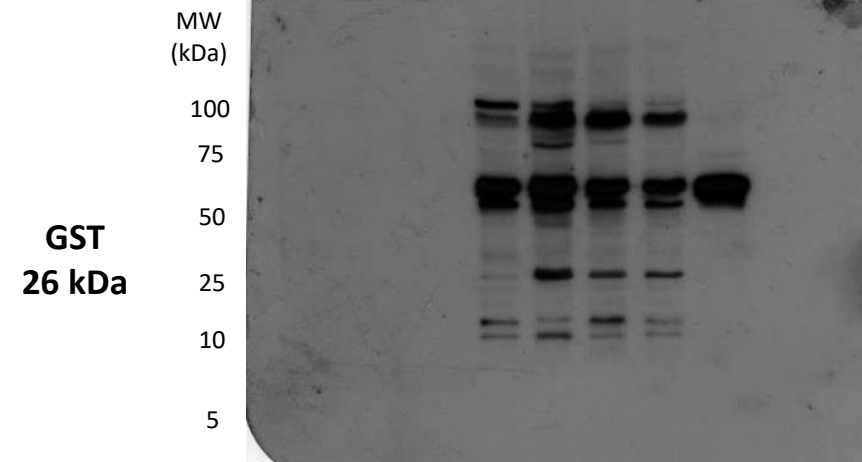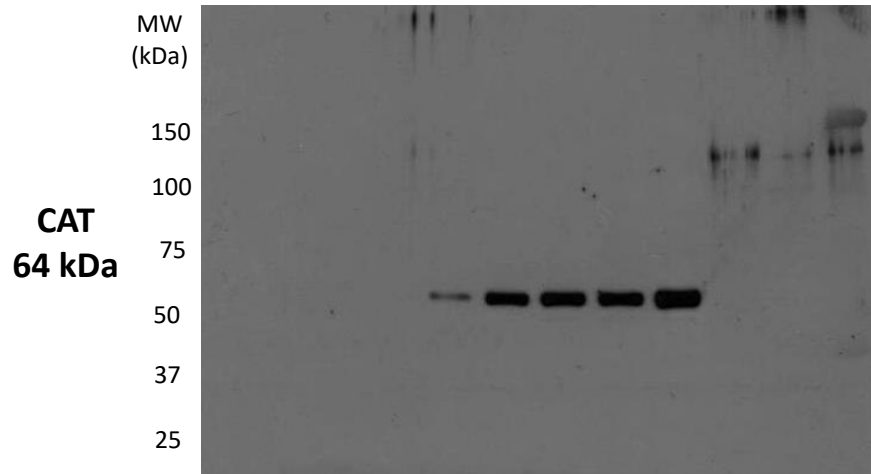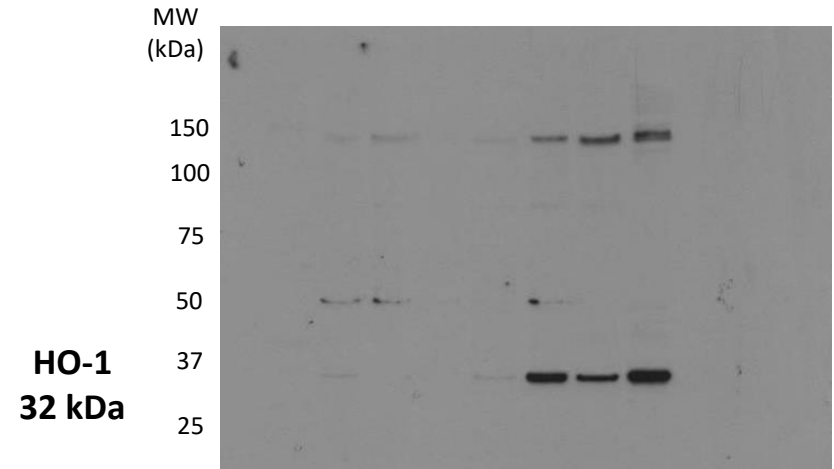

**Figure 4**

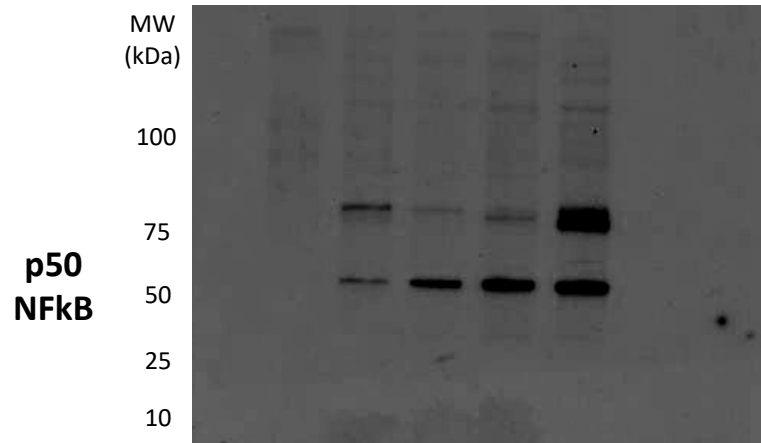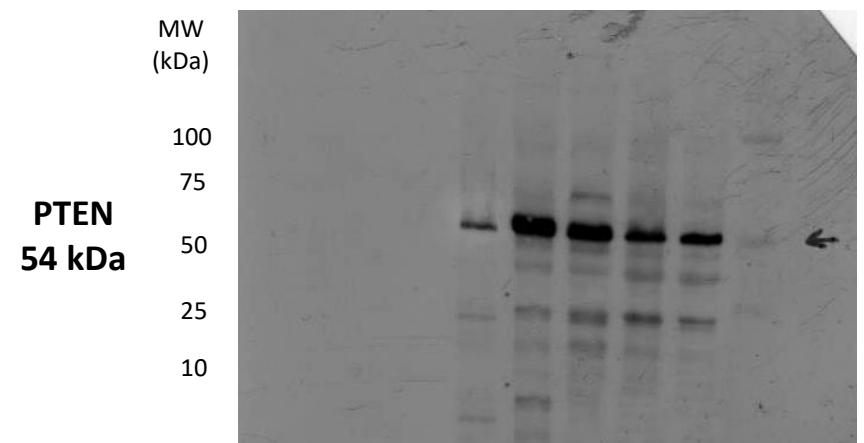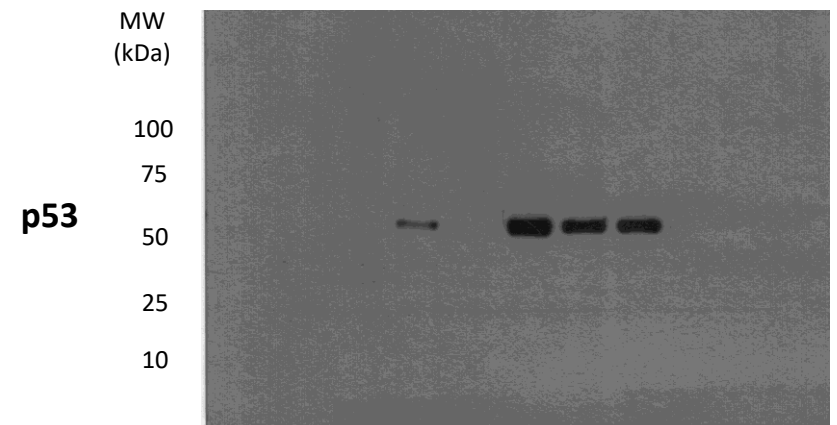

**Figure 5**

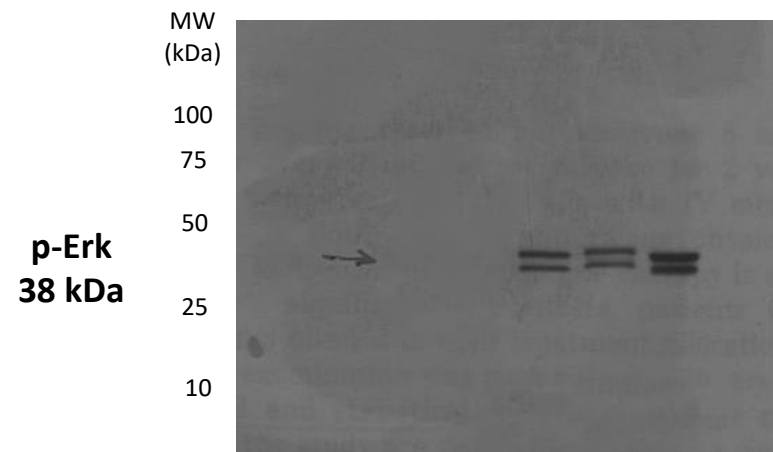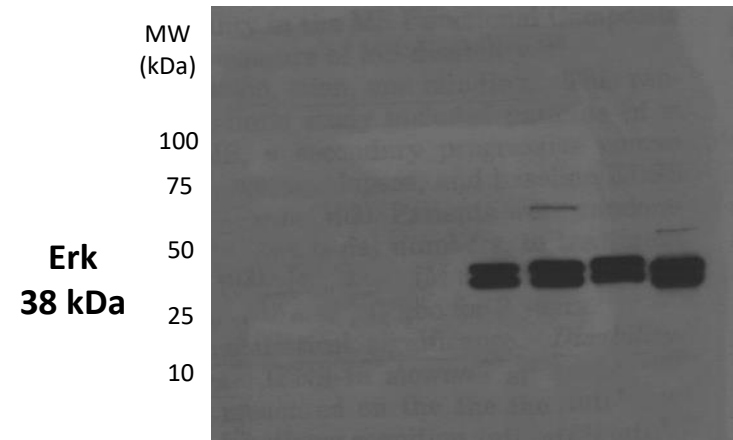

**Figure 6**

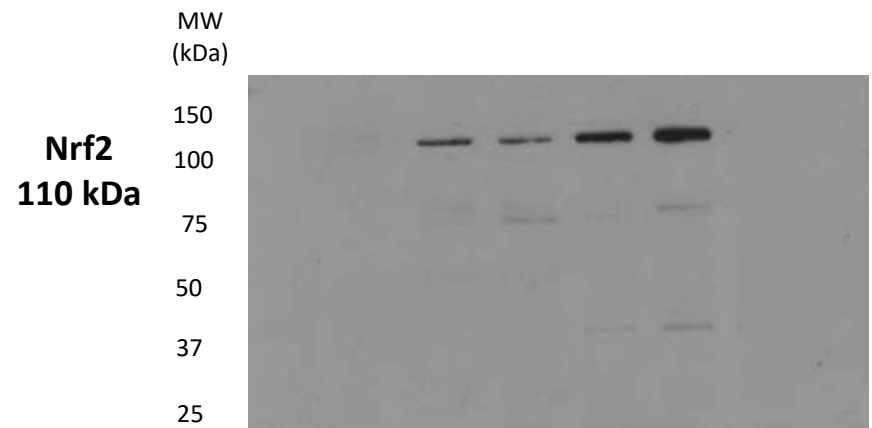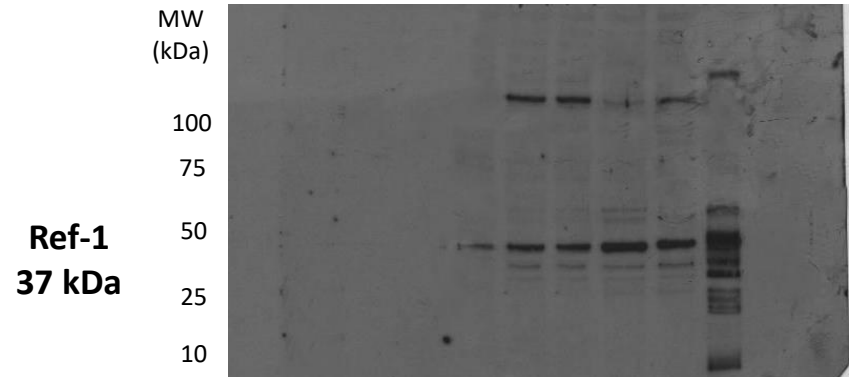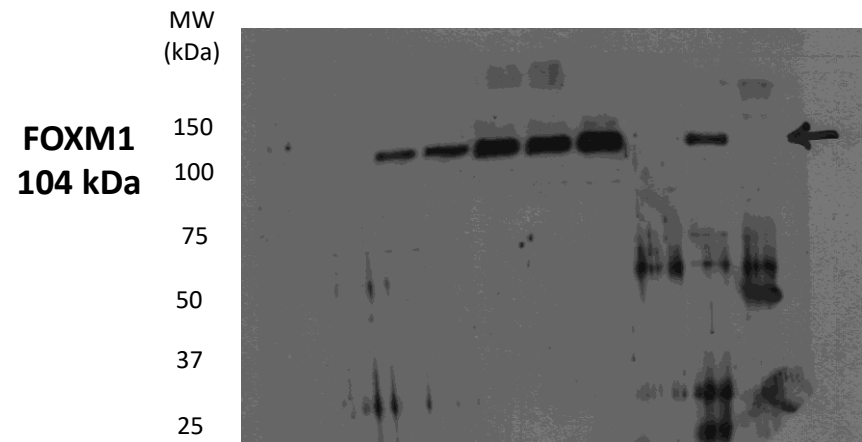

Supplement: s1 [file s1]
